# Supplementary material for: Access to Burn Care in Low- and Middle-Income Countries: An Assessment of Timeliness, Surgical Capacity, and Affordability in a Regional Referral Hospital in Tanzania
Source: PubMed Central journal article supplement (PMC9113785; doi:10.1093/jbcr/irab191), 2021-10-13
Supplement: irab191_suppl_supplementary_appendix_1.pdf [file irab191_suppl_supplementary_appendix_1.pdf]

## ASSESSMENT OF ACCESS TO BURN CARE acute burn wounds

### Questions are answered by

Patient

Caregiver – Relation to the patient: \_\_\_\_\_

### 1 PATIENT DEMOGRAPHICS

#### 1A Gender:

Male

Female

#### 1B Age:

Year of birth \_\_\_\_\_

#### 1C Address:

Kijiji:

\_\_\_\_\_

Kata:

\_\_\_\_\_

Wilaya:

\_\_\_\_\_

Mkua:

\_\_\_\_\_

**1D Education:**

What is the highest educational level that you have achieved or are currently following?

- None (includes nursery)
- Primary school
- Secondary school (junior / senior)
- Tertiary (diploma, colleges, bachelors)
- Graduate degree (Master degree, PhD)

**1E Literacy:**

Are you able to read and write in any language?

*[For adults and children who are currently learning how to read and write answer: 'No']*

- Yes
- No

**1F Occupation:**

What is your primary occupation?

- Unemployed [Currently looking for jobs, retiree's, students]
- Home maker [Housewives]
- Domestic helpers [Cleaners, housekeepers, watch guards]
- Farmer [Herders, agriculture, pastoralist]
- Self-employed / small-business [Small business owners like: shops, kiosks, food traders]
- Government employee [Police officer, accountant, teachers, health care workers]
- Non-government employee [Cooperation managers, NGO-staff]

**1G Tribe**

What is your ethnic background?

[In case of refusal to answer, ask whether the person was born in Tanzania]

**2. INJURY****2.A TBSA (%)**

\_\_\_\_\_ %

**2.B Depth (maximum)**

- Superficial burn wound (first degree)
- Superficial dermal burn wound (second degree)
- Deep dermal burn wound (deep second degree)
- Full thickness burn wound (third degree)
- Full thickness burn wound involving underlying structures (fourth degree)

### **3. TIMELINESS**

#### **3A Transport to HLH**

What is the main way for you to go to HLH?

- Public transport (bus/taxi)
- Private car
- Private motorcycle
- Pikipiki
- Bicycle
- Animal
- On foot
- Carried
- Ambulance

#### **3B Hours of traveling from home to HLH:**

How long does it take you in total to get to HLH if you don't have to wait for transportation?

\_\_\_\_\_ hours

#### **3C Waiting time for transport:**

How long do you probably have to wait for transportation?

\_\_\_\_\_ hours

**3D KM of traveling from home to HLH:**

How many kilometers do you have to travel to get from home to HLH?

\_\_\_\_\_ KM

**3E Time of injury \*, time of admission \*, duration of admission\*:**

Date of injury:

\_\_\_\_\_

Date of presentation at first healthcare facility:

\_\_\_\_\_

Length of admission first healthcare facility:

\_\_\_\_\_

Date of admission to HLH:

\_\_\_\_\_

Time injury to admission/presentation HLH:

\_\_\_\_\_

Duration of admission HLH:

\_\_\_\_\_

**4. SURGICAL CAPACITY**

**4A Healthcare received before admission to HLH:**

What kind of treatment did you receive before you came to HLH?

- None
- Traditional healer
- Dispensary
- Primary healthcare facility

Hospital

**4A.1 Reasons for not seeking burn care (>3 days after the injury):**

No need

No money for health care

No (money for) transportation

No time

Fear/no trust

**4A.2 If treated by another hospital/healthcare facility, what kind of treatment was received?**

Conservative treatment (wound care/injections/oral medication)

Escharotomy

Escharectomy

Escharectomy and early skin graft

Early skin graft

Delayed skin graft

Amputation

Muscle flap

**4B. Referral by other hospital/healthcare facility:**

Was referral to HLH indicated?

Yes

No

**4B.1 Were you referred in an acceptable time (before 2-3 weeks)?**

*[Only when "traditional healer" is answered to 4A]*

Yes

No

**4B.2 What was the reason for delay in referral?**

Not referred because not informed by other hospital/healthcare facility

I refused referral

**4C Was surgical care indicated?**

Yes

No

**4C.1 Did you receive surgical care at HLH?**

Yes

No

**4C.2 If yes, what kind of surgical care did you receive and how often?**

*[Only when "yes" is answered to 4B]*

Conservative treatment (wound care/injections/oral medication)

Escharotomy

Escharectomy

Escharectomy and early skin graft

Early skin graft

Delayed skin graft

Amputation

Muscle flap

### **4C.3 If no, what were the reasons for not receiving surgical care?**

*[Only when "no" is answered to 4B]*

- No need
- No money for health care
- No (money for) transportation
- No time
- Fear/no trust
- Not available (facility/personnel/equipment)

## **5. AFFORDABILITY**

### **5A Insurance:**

Do you have an insurance?\*

- NHIF
- CHF
- Other
- None

### **5B Daily budget**

What is the daily budget of the household?

\_\_\_\_\_ Tanzanian shilling per day

- Tsh 0 – Tsh 4500 per day
- Tsh 4500 – Tsh 6000 per day
- Tsh 8000 – Tsh 10,000 per day
- Tsh 10,000 – Tsh 15,000 per day
- Tsh 15,000 – Tsh 25,000 per day
- Tsh 25,000 – Tsh 50,000 per day
- Tsh >50,000 per day

**5C Acres of land**

How many acres of land do you own?

\_\_\_\_\_ acres

**5D Amount of patient fee**

Total amount of patient fee

\_\_\_\_\_ Tanzanian shilling

Fee covered by patient

\_\_\_\_\_ Tanzanian shilling

What was arranged about the outstanding amount of money?

- The amount was to be paid in installments
- The amount was absconded
- The amount was paid by a poor patient fund

**5D Transportation costs:**

What does it cost you to travel one time from home to HLH?

\_\_\_\_\_ Tanzanian shilling
