# Supplementary material for: Access to Burn Care in Low- and Middle-Income Countries: An Assessment of Timeliness, Surgical Capacity, and Affordability in a Regional Referral Hospital in Tanzania
Source: PubMed Central journal article supplement (PMC9113785; doi:10.1093/jbcr/irab191), 2021-10-13
Supplement: irab191_suppl_supplementary_appendix_2.pdf [file irab191_suppl_supplementary_appendix_2.pdf]

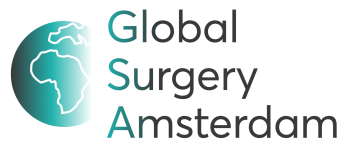

## ASSESSMENT OF ACCESS TO BURN CARE contractures

Questions are answered by

Patient

Caregiver – Relation to the patient: \_\_\_\_\_

### **1 PATIENT DEMOGRAPHICS**

**1A Gender:**

Male

Female

**1B Age:**

Year of birth \_\_\_\_\_

**1C Adress:**

Kijiji:

\_\_\_\_\_

Kata:

\_\_\_\_\_

Wilaya:

\_\_\_\_\_

Mkua:

---

**1D Education:**

What is the highest educational level that you have achieved or are currently following?

- None (includes nursery)
- Primary school
- Secondary school (junior / senior)
- Tertiary (diploma, colleges, bachelors)
- Graduate degree (Master degree, PhD)

**1E Literacy:**

Are you able to read and write in any language?

*[For adults and children who are currently learning how to read and write answer: 'No']*

- Yes
- No

**1F Occupation:**

What is your primary occupation?

- Unemployed [Currently looking for jobs, retiree's, students]
- Home maker [Housewives]
- Domestic helpers [Cleaners, housekeepers, watch guards]
- Farmer [Herders, agriculture, pastoralist]
- Self-employed / small-business [Small business owners like: shops, kiosks, food traders]
- Government employee [Police officer, accountant, teachers, health care workers]
- Non-government employee [Cooperation managers, NGO-staff]

**1G Tribe**

What is your ethnic background?

[In case of refusal to answer, ask whether the person was born in Tanzania]

\_\_\_\_\_

## **2. INJURY**

### **2.A Estimated TBSA (%)**

\_\_\_\_\_ %

### **2.B Location**

\_\_\_\_\_

## **3. TIMELINESS**

### **3A Transport to HLH**

What is the main way for you to go to HLH?

- Public transport (bus/taxi)
- Private car
- Private motorcycle
- Pikipiki
- Tuktuk
- Bicycle
- Animal
- On foot
- Carried
- Ambulance

### **3B Hours of traveling from home to HLH:**

How long does it take you in total to get to HLH if you don't have to wait for transportation?

\_\_\_\_\_ hours

### **3C Waiting time for transport:**

How long do you probably have to wait for transportation?

\_\_\_\_\_ hours

**3D KM of traveling from home to HLH:**

How many kilometers do you have to travel to get from home to HLH?

\_\_\_\_\_ KM

**3E Date of injury, date of admission, duration of admission:**

Date of injury:

\_\_\_\_\_

Date of admission to HLH:

\_\_\_\_\_

Delay from injury to admission:

\_\_\_\_\_

Duration of admission:

\_\_\_\_\_

**4. SURGICAL CAPACITY**

**4A Healthcare received before admission to HLH:**

What kind of treatment did you receive before you came to HLH?

- None
- Traditional healer
- Dispensary
- Primary healthcare facility
- Hospital

Description of previous treatment

\_\_\_\_\_

**4A.2 Reasons for not having received surgical treatment before admission at HLH:**

*[Only when "none" is answered to 4A]*

What was the main reason not to go to a health facility to see a doctor/nurse or not to have an operation or dressings?

- No need

- No money for health care
- No (money for) transportation
- No time
- Fear/no trust

**4A.1 How was the burn wound initially treated?**

*[Only when "dispensary", "primary healthcare facility" or "hospital" is answered to 4A]*

- Conservative treatment
- Escharotomy
- Escharectomy
- Debridement
- Skin grafting
- Amputation

**4A.1 Was there an indication for surgical care?**

- Yes
- No

**4B Did you receive surgical care at HLH?**

- Yes
- No

**4B.1 If yes, what kind of surgical care did you receive and how often?**

*[Only when "yes" is answered to 4B]*

- Contracture release
- FTG
- SSG

Z-plasty

Transposition flap

**4B.2 If no, what were the reasons for not receiving surgical care?**

*[Only when "no" is answered to 4B]*

No need

No money for health care

No (money for) transportation

No time

Fear/no trust

Not available (facility/personnel/equipment)

**5. AFFORDABILITY**

**5A Insurance:**

Do you have an insurance?

NHIF

CHF

Other

None

**5B Daily budget**

What is the daily budget of the household?

\_\_\_\_\_ Tanzanian shilling per day

Tsh 0 – Tsh 4500 per day

Tsh 4500 – Tsh 6000 per day

Tsh 8000 – Tsh 10,000 per day

Tsh 10,000 – Tsh 15,000 per day

Tsh 15,000 – Tsh 25,000 per day

Tsh 25,000 – Tsh 50,000 per day

Tsh >50,000 per day

**5C Amount of patient fee**

Total amount of patient fee

\_\_\_\_\_ Tanzanian shilling

% of patient fee covered by patients

\_\_\_\_\_ %

% of patient fee covered by HLH

\_\_\_\_\_ %

**5D Transportation costs:**

What does it cost you to travel one time from home to HLH?

\_\_\_\_\_ Tanzanian shilling
